# Supplementary material for: Electron transport through nanoscale multilayer graphene and hexagonal boron nitride junctions
Source: publisher site journal article supplement (doi:10.3762/bjnano.16.147), 2025-11-24
Supplement: Additional file 1 [file 2190-4286-16-147-S1.pdf]

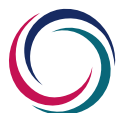

## Supporting Information

for

### **Electron transport through nanoscale multilayer graphene and hexagonal boron nitride junctions**

Aleksandar Staykov and Takaya Fujisaki

*Beilstein J. Nanotechnol.* **2025**, *16*, 2132–2143. doi:10.3762/bjnano.16.147

### **Transmission spectra for 0.0 and 0.8 V applied biases for all investigated junctions**

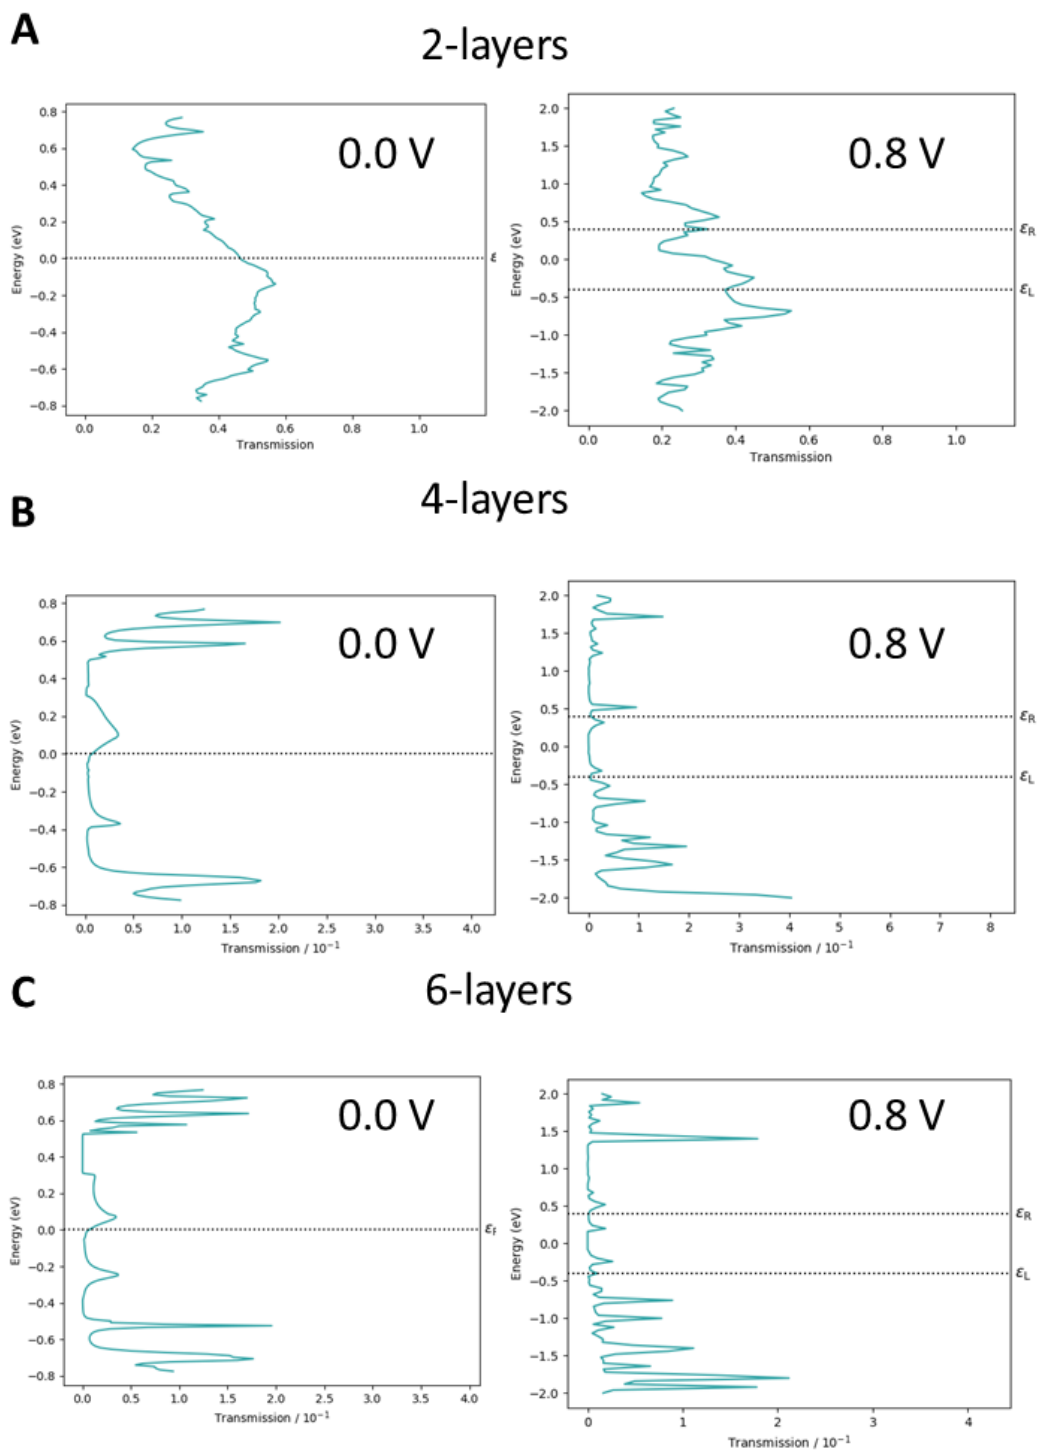

**Figure S1:** Transmission spectra for 0.0 and 0.8 V applied biases through Pt/graphene/Pt junctions with (A) two layers, (B) four layers, and (C) six layers.

**A****2-layers**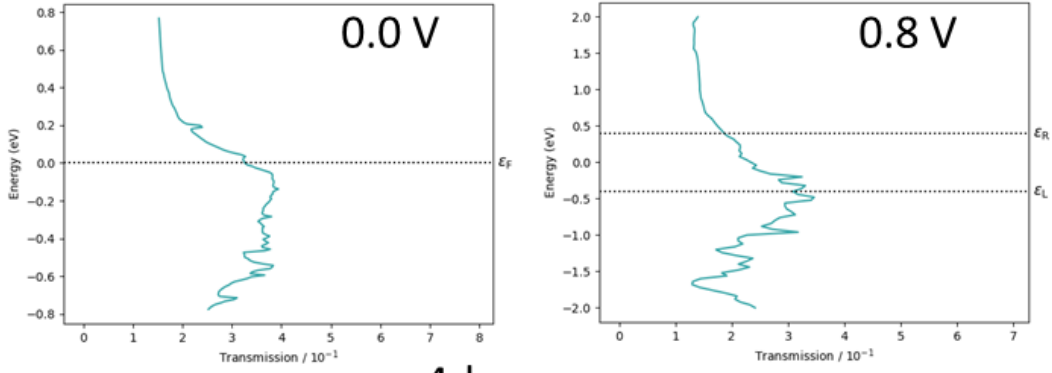**B****4-layers**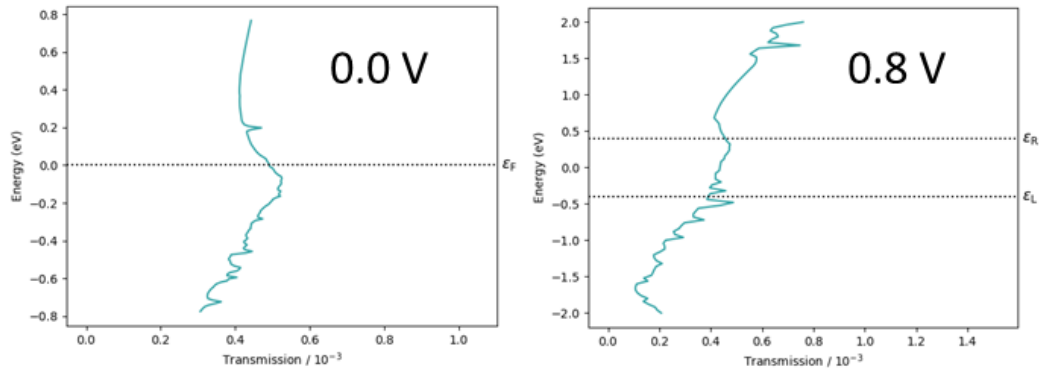**C****6-layers**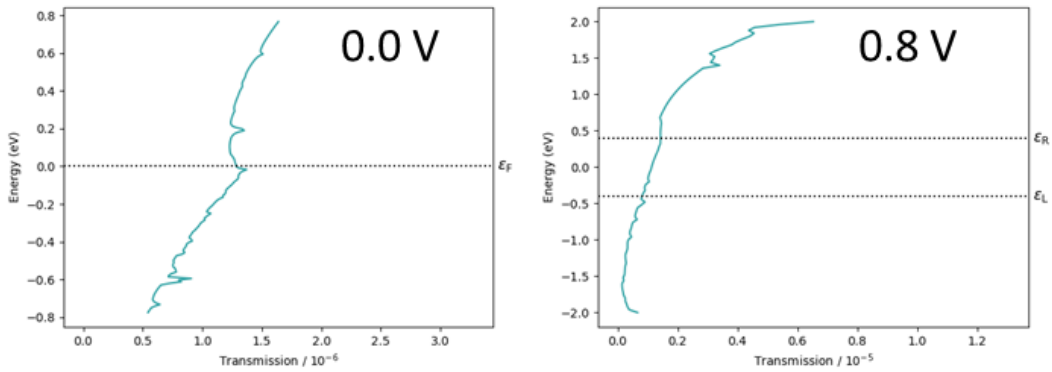

**Figure S2:** Transmission spectra for 0.0 and 0.8 V applied biases through Pt/h-BN/Pt junctions with (A) two layers, (B) four layers, and (C) six layers.

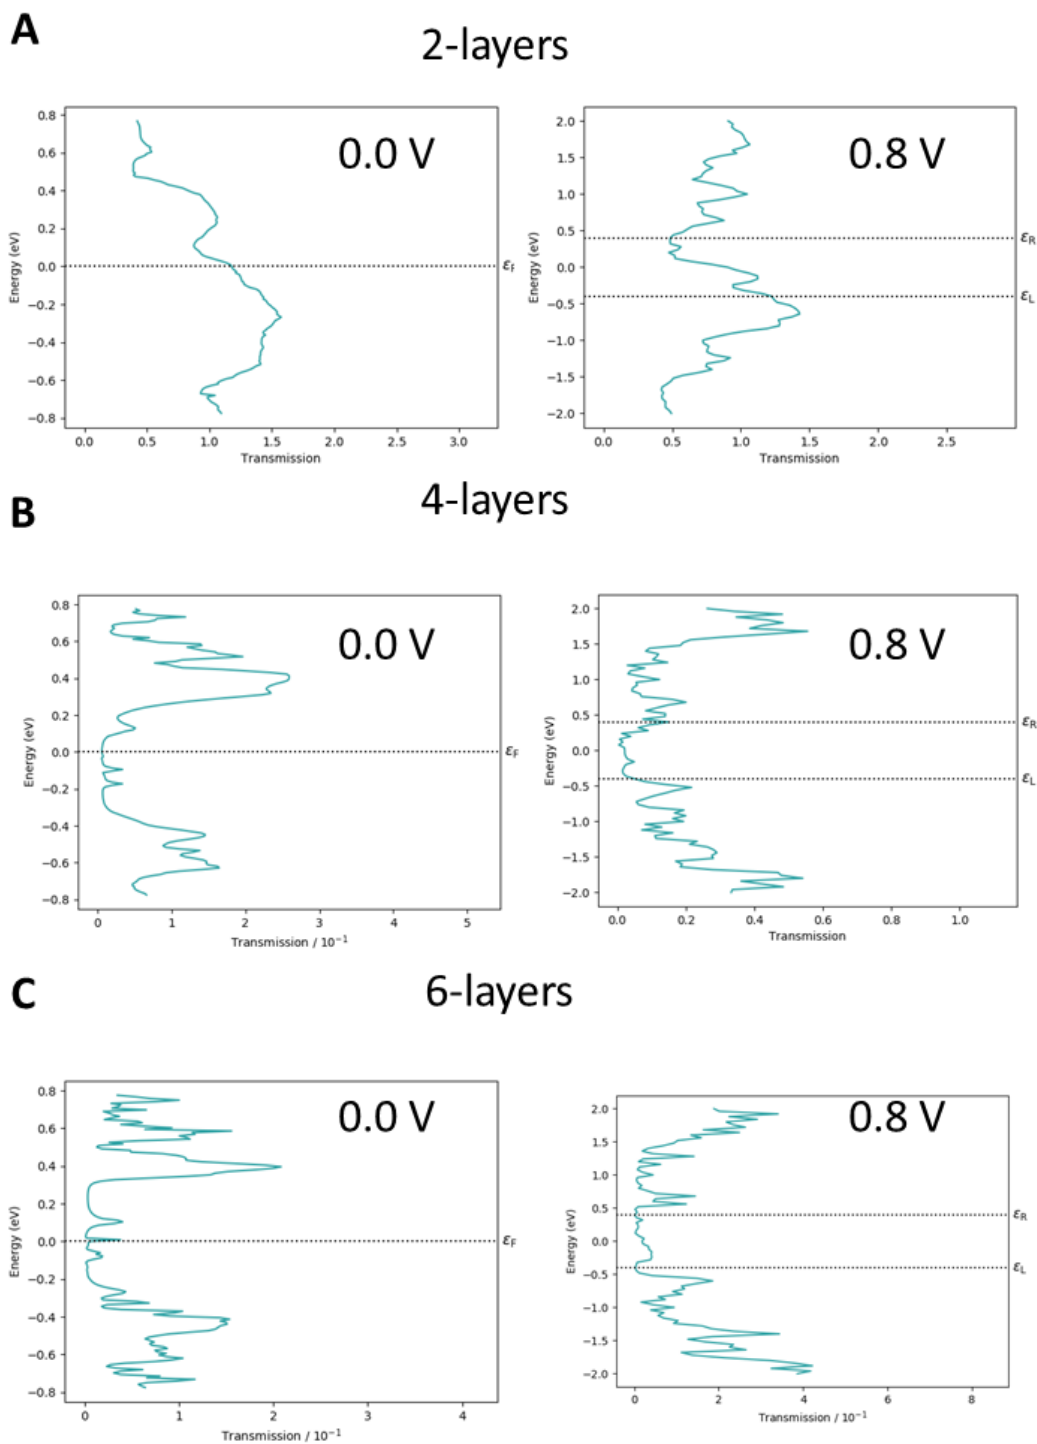

**Figure S3:** Transmission spectra for 0.0 and 0.8 V applied biases through Pt/graphene with Stone–Wales defect/Pt junction with (A) two layers, (B) four layers, and (C) six layers.

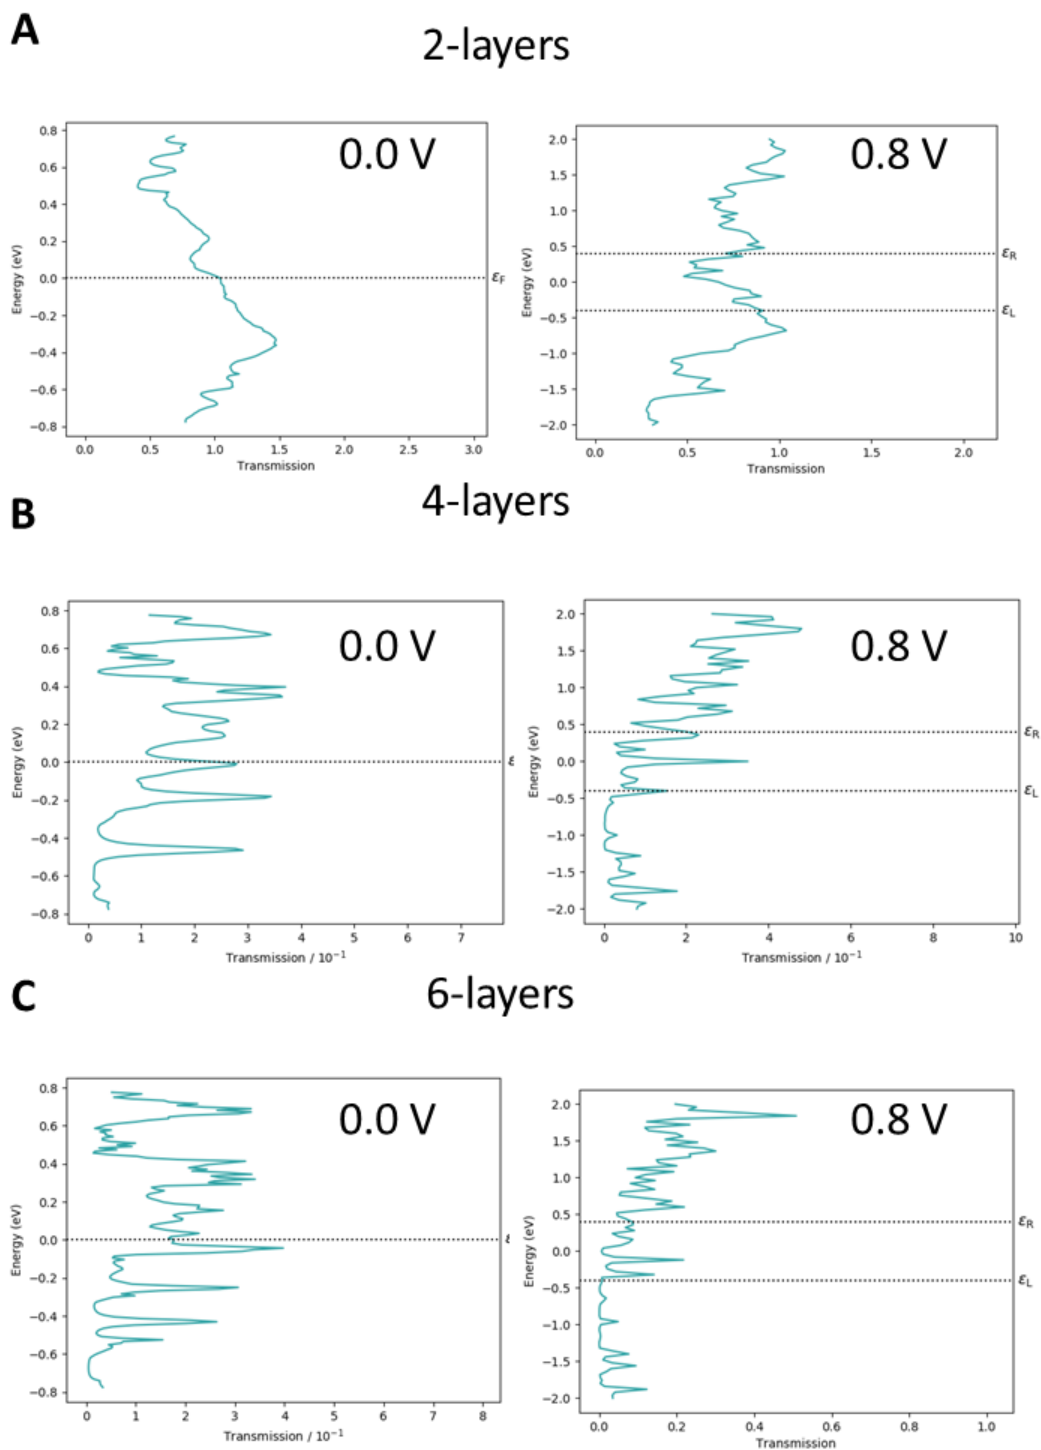

**Figure S4:** Transmission spectra for 0.0 and 0.8 V applied biases through Pt/graphene with N-doping/Pt junction with (A) two layers, (B) four layers, and (C) six layers.

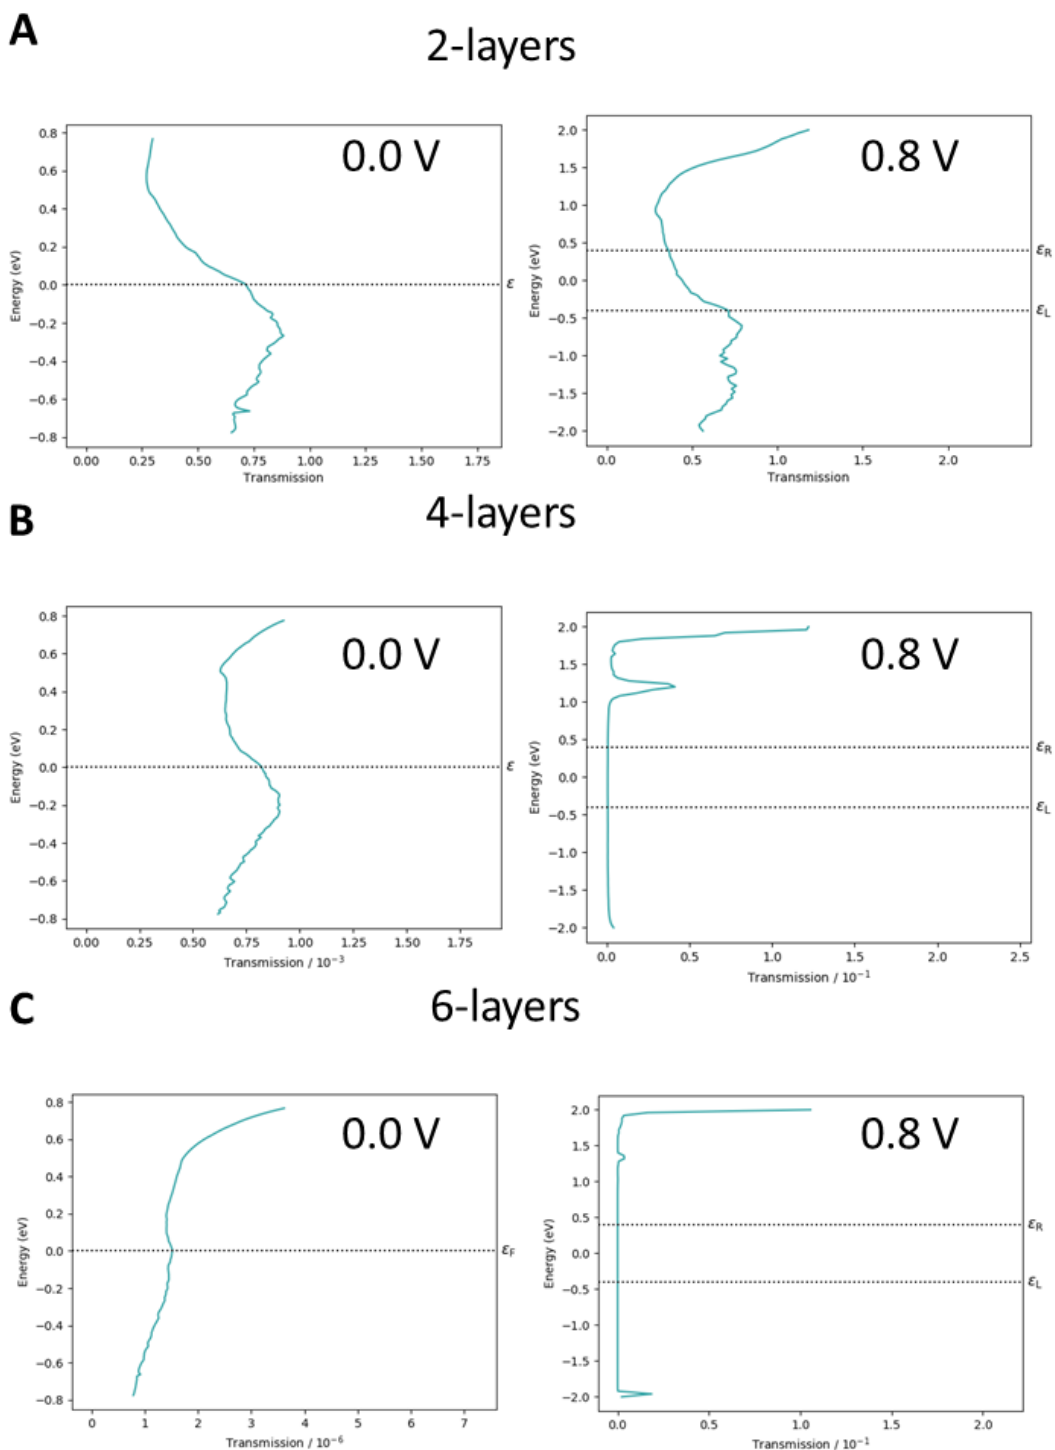

**Figure S5:** Transmission spectra for 0.0 and 0.8 V applied biases through Pt/h-BN with Stone–Wales defect/Pt junction with (A) two layers, (B) four layers, and (C) six layers.
